# Supplementary material for: An optimized culture medium to isolate Lactobacillus fermentum strains from the human intestinal tract
Source: Royal Society of Chemistry journal article supplement (doi:10.1039/d1fo00209k), 2021-01-01
Supplement: d1fo00209k1.pdf [file d1fo00209k1.pdf]

Food and Function

SUPPLEMENTAL MATERIAL

**Table S1:** The detection frequency of each species in the fecal samples of 200 people.

| Species                    | Frequence | Species                   | Frequence |
|----------------------------|-----------|---------------------------|-----------|
| <i>L. mucosae</i>          | 200       | <i>L. acidipiscis</i>     | 44        |
| <i>L. plantarum</i>        | 200       | <i>L. gastricus</i>       | 33        |
| <i>L. salivarius</i>       | 200       | <i>L. coryniformis</i>    | 31        |
| <i>L. ruminis</i>          | 196       | <i>L. curvatus</i>        | 30        |
| <i>L. gasseri</i>          | 193       | <i>L. harbinensis</i>     | 26        |
| <i>L. rhamnosus</i>        | 193       | <i>L. mindensis</i>       | 23        |
| <i>L. crispatus</i>        | 192       | <i>L. acetotolerans</i>   | 21        |
| <i>L. delbrueckii</i>      | 189       | <i>L. buchneri</i>        | 21        |
| <i>L. fermentum</i>        | 188       | <i>L. kefiranofaciens</i> | 19        |
| <i>L. oris</i>             | 181       | <i>L. panis</i>           | 19        |
| <i>L. vaginalis</i>        | 175       | <i>L. parafarraginis</i>  | 12        |
| <i>L. casei</i>            | 173       | <i>L. brevis</i>          | 11        |
| <i>L. reuteri</i>          | 142       | <i>L. diolivorans</i>     | 8         |
| <i>L. amylovorus</i>       | 132       | <i>L. dextrinicus</i>     | 7         |
| <i>L. sakei</i>            | 127       | <i>L. ingluviei</i>       | 7         |
| <i>L. johnsonii</i>        | 121       | <i>L. intestinalis</i>    | 7         |
| <i>L. acidophilus</i>      | 115       | <i>L. parabuchneri</i>    | 6         |
| <i>L. helveticus</i>       | 102       | <i>L. agilis</i>          | 5         |
| <i>L. rossiae</i>          | 96        | <i>L. hilgardii</i>       | 5         |
| <i>L. pentosus</i>         | 94        | <i>L. manihotivorans</i>  | 5         |
| <i>L. frumenti</i>         | 74        | <i>L. secaliphilus</i>    | 4         |
| <i>L. gallinarum</i>       | 72        | <i>L. fuchuensis</i>      | 3         |
| <i>L. pontis</i>           | 66        | <i>L. murinus</i>         | 2         |
| <i>L. paracasei</i>        | 65        | <i>L. spicheri</i>        | 2         |
| <i>L. iners</i>            | 60        | <i>L. vaccinostercus</i>  | 2         |
| <i>L. sanfranciscensis</i> | 53        |                           |           |

## Food and Function

**Table S2:** The screening of *Lactobacillus* from human fecal samples on LAMVAB.

| Sample  | Region                                                                          | Human Information | Strains                            | Number |
|---------|---------------------------------------------------------------------------------|-------------------|------------------------------------|--------|
| HN22    | Qinghua county, Boai city,<br>Henan province                                    | male, age of 73   | <i>Weissella cibaria</i>           | 2      |
|         |                                                                                 |                   | <i>Weissella paramesenteroides</i> | 1      |
|         |                                                                                 |                   | <i>Pediococcus pentosaceus</i>     | 4      |
| HN34    | Qinghua county, Boai city,<br>Henan province                                    | female, age of 41 | <i>Pediococcus pentosaceus</i>     | 5      |
|         |                                                                                 |                   | <i>Weissella cibaria</i>           | 4      |
| HN39    | Qinghua county, Boai city,<br>Henan province                                    | male, age of 4    | <i>Weissella cibaria</i>           | 7      |
|         |                                                                                 |                   | <i>Pediococcus pentosaceus</i>     | 1      |
| FBJSY17 | Haidian district, Beijing                                                       | Male, age of 32   | <i>Weissella cibaria</i>           | 2      |
|         |                                                                                 |                   | <i>Pediococcus pentosaceus</i>     | 2      |
| FBJSY12 | Haidian district, Beijing                                                       | female, age of 29 | <i>Weissella cibaria</i>           | 1      |
| FSCCD15 | Chengdu city, Sichuan province                                                  | male, age of 3    | <i>Pediococcus pentosaceus</i>     | 4      |
| FSCDJY4 | Jianfeng village, Qingchengshan<br>county, Dujiangyan city, Sichuan<br>province | /                 | <i>Weissella paramesenteroides</i> | 2      |
| FSCDJY4 | Jianfeng village, Qingchengshan<br>county, Dujiangyan city, Sichuan<br>province | male, age of 75   | <i>Pediococcus pentosaceus</i>     | 4      |
| FSCPS27 | Gongyi village, Pengshan county,<br>Meishan city, Sichuan province              | male, age of 62   | <i>Pediococcus pentosaceus</i>     | 3      |
| FGS66   | Yongchang county, Jinchang city,<br>Gansu province                              | male, age of 17   | <i>Weissella cibaria</i>           | 3      |
| FGX11   | Bama county, Gangxi province                                                    | male, age of 38   | <i>Weissella paramesenteroides</i> | 1      |
| FXJSW8  | Laoshawan village, Shawan county,<br>Xinjiang province                          | male, age of 51   | <i>Pediococcus pentosaceus</i>     | 1      |
| FXJSW9  | Laoshawan village, Shawan county,<br>Xinjiang province                          | female, age of 53 | <i>Weissella cibaria</i>           | 1      |
| FQHYN27 | Xining city, Qinghai province                                                   | female, age of 62 | <i>Pediococcus pentosaceus</i>     | 2      |
| FQHYN20 | Xining city, Qinghai province                                                   | /                 | <i>Weissella cibaria</i>           | 2      |
| FWXBH5  | Binhu district, Wuxi city, Jiangsu<br>province                                  | female, age of 81 | <i>Lactobacillus antri</i>         | 1      |

### Food and Function

|         |                                                                      |                   |                            |    |
|---------|----------------------------------------------------------------------|-------------------|----------------------------|----|
| FWXBH20 | Binhu district, Wuxi city, Jiangsu province                          | male, age of 90   | <i>Lactobacillus antri</i> | 1  |
| FWXBH29 | Binhu district, Wuxi city, Jiangsu province                          | female, age of 87 | <i>Lactobacillus antri</i> | 3  |
| NT57    | Nantong city, Jiangsu province                                       | male, age of 74   | <i>Lactobacillus antri</i> | 2  |
| NT74    | Nantong city, Jiangsu province                                       | female, age of 96 | <i>Lactobacillus antri</i> | 10 |
| NT72    | Nantong city, Jiangsu province                                       | female, age of 84 | <i>Lactobacillus antri</i> | 2  |
| GD4     | Shuntoulin village, Shantang town, Lianzhou city, Guangzhou province | male, age of 73   | <i>Lactobacillus antri</i> | 4  |
| GD7     | Shuntoulin village, Shantang town, Lianzhou city, Guangzhou province | female, age of 60 | <i>Lactobacillus antri</i> | 1  |
| GD14    | Shuntoulin village, Shantang town, Lianzhou city, Guangzhou province | male, age of 84   | <i>Lactobacillus antri</i> | 2  |

---

**Food and Function**

**Table S3:** The screening of *Lactobacillus* from human fecal samples on MRS, LAMVAB, and LAMVAA.

| Sample  | Region                           | Strains                           | Number | Medium |
|---------|----------------------------------|-----------------------------------|--------|--------|
| FJXFC47 | Fengcheng city, Jiangxi province | <i>Enterobacter hormaechei</i>    | 3      | MRS    |
|         |                                  | <i>Klebsiella pneumoniae</i>      | 5      | MRS    |
|         |                                  | <i>Escherichia coli</i>           | 2      | MRS    |
| FJXFC49 | Fengcheng city, Jiangxi province | <i>Enterococcus faecalis</i>      | 6      | MRS    |
|         |                                  | <i>Weissella cibaria</i>          | 3      | MRS    |
|         |                                  | <i>Enterococcus faecium</i>       | 1      | MRS    |
| FJXFC50 | Fengcheng city, Jiangxi province | <i>Enterococcus faecium</i>       | 5      | MRS    |
|         |                                  | <i>Klebsiella pneumoniae</i>      | 4      | MRS    |
|         |                                  | <i>Escherichia coli</i>           | 1      | MRS    |
| FJXFC51 | Fengcheng city, Jiangxi province | <i>Streptococcus equinus</i>      | 7      | MRS    |
|         |                                  | <i>Weissella cibaria</i>          | 2      | MRS    |
|         |                                  | <i>Enterococcus faecalis</i>      | 1      | MRS    |
| FJXFC52 | Fengcheng city, Jiangxi province | <i>Streptococcus equinus</i>      | 3      | MRS    |
|         |                                  | <i>Lactobacillus mucosae</i>      | 3      | MRS    |
|         |                                  | <i>Lactobacillus crispatus</i>    | 1      | MRS    |
|         |                                  | <i>Staphylococcus hominis</i>     | 3      | MRS    |
| FJXFC53 | Fengcheng city, Jiangxi province | <i>Escherichia coli</i>           | 8      | MRS    |
|         |                                  | <i>Klebsiella pneumoniae</i>      | 1      | MRS    |
|         |                                  | <i>Weissella cibaria</i>          | 1      | MRS    |
| FJXFC54 | Fengcheng city, Jiangxi province | <i>Escherichia coli</i>           | 4      | MRS    |
|         |                                  | <i>Streptococcus gallolyticus</i> | 6      | MRS    |
| FJXFC55 | Fengcheng city, Jiangxi province | <i>Escherichia coli</i>           | 6      | MRS    |
|         |                                  | <i>Klebsiella pneumoniae</i>      | 4      | MRS    |
| FJXFC56 | Fengcheng city, Jiangxi province | <i>Klebsiella pneumoniae</i>      | 4      | MRS    |
|         |                                  | <i>Weissella cibaria</i>          | 5      | MRS    |
|         |                                  | <i>Streptococcus equinus</i>      | 1      | MRS    |
| FJXFC47 | Fengcheng city, Jiangxi province | No Strain                         | 0      | LAMVAB |
| FJXFC49 | Fengcheng city, Jiangxi province | <i>Enterococcus faecalis</i>      | 2      | LAMVAB |
|         |                                  | <i>Weissella cibaria</i>          | 5      | LAMVAB |
|         |                                  | <i>Lactobacillus plantarum</i>    | 3      | LAMVAB |
| FJXFC50 | Fengcheng city, Jiangxi province | No Strain                         | 0      | LAMVAB |
| FJXFC51 | Fengcheng city, Jiangxi province | <i>Weissella cibaria</i>          | 6      | LAMVAB |
|         |                                  | <i>Lactobacillus antri</i>        | 2      | LAMVAB |
|         |                                  | <i>Lactobacillus mucosae</i>      | 2      | LAMVAB |
| FJXFC52 | Fengcheng city, Jiangxi province | <i>Lactobacillus fermentum</i>    | 1      | LAMVAB |
|         |                                  | <i>Lactobacillus antri</i>        | 2      | LAMVAB |
|         |                                  | <i>Lactobacillus mucosae</i>      | 7      | LAMVAB |

**Food and Function**

---

|         |                                  |                                 |   |        |
|---------|----------------------------------|---------------------------------|---|--------|
| FJXFC53 | Fengcheng city, Jiangxi province | No Strain                       | 0 | LAMVAB |
| FJXFC54 | Fengcheng city, Jiangxi province | <i>Lactobacillus antri</i>      | 4 | LAMVAB |
|         |                                  | <i>Lactobacillus fermentum</i>  | 2 | LAMVAB |
|         |                                  | <i>Lactobacillus mucosae</i>    | 4 | LAMVAB |
| FJXFC55 | Fengcheng city, Jiangxi province | No Strain                       | 0 | LAMVAB |
| FJXFC56 | Fengcheng city, Jiangxi province | <i>Weissella cibaria</i>        | 5 | LAMVAB |
|         |                                  | <i>Lactobacillus antri</i>      | 3 | LAMVAB |
|         |                                  | <i>Pediococcus pentosaceus</i>  | 2 | LAMVAB |
| FJXFC47 | Fengcheng city, Jiangxi province | No Strain                       | 0 | LFMATA |
| FJXFC49 | Fengcheng city, Jiangxi province | <i>Lactobacillus fermentum</i>  | 8 | LFMATA |
|         |                                  | <i>Lactobacillus antri</i>      | 2 | LFMATA |
| FJXFC50 | Fengcheng city, Jiangxi province | No Strain                       | 0 | LFMATA |
| FJXFC51 | Fengcheng city, Jiangxi province | <i>Klebsiella pneumoniae</i>    | 2 | LFMATA |
|         |                                  | <i>Lactobacillus fermentum</i>  | 8 | LFMATA |
| FJXFC52 | Fengcheng city, Jiangxi province | <i>Lactobacillus fermentum</i>  | 8 | LFMATA |
|         |                                  | <i>Lactobacillus mucosae</i>    | 2 | LFMATA |
| FJXFC53 | Fengcheng city, Jiangxi province | No Strain                       | 0 | LFMATA |
| FJXFC54 | Fengcheng city, Jiangxi province | <i>Lactobacillus fermentum</i>  | 9 | LFMATA |
|         |                                  | <i>Lactobacillus antri</i>      | 1 | LFMATA |
| FJXFC55 | Fengcheng city, Jiangxi province | No Strain                       | 0 | LFMATA |
| FJXFC56 | Fengcheng city, Jiangxi province | <i>Lactobacillus fermentum</i>  | 8 | LFMATA |
|         |                                  | <i>Lactobacillus salivarius</i> | 2 | LFMATA |

---

**Food and Function****Table S4:** Detailed information of the human fecal samples.

| <b>Sample</b> | <b>Region</b>                              | <b>Human information</b> |
|---------------|--------------------------------------------|--------------------------|
| AHWH1         | AHWH, Wuhu city, Anhui province, china     | female, age of 70        |
| AHWH2         | AHWH, Wuhu city, Anhui province, china     | female, age of 93        |
| AHWH3         | AHWH, Wuhu city, Anhui province, china     | male, age of 81          |
| AHWH4         | AHWH, Wuhu city, Anhui province, china     | female, age of 71        |
| AHWH5         | AHWH, Wuhu city, Anhui province, china     | male, age of 43          |
| AHWH6         | AHWH, Wuhu city, Anhui province, china     | male, age of 51          |
| AHWH7         | AHWH, Wuhu city, Anhui province, china     | female, age of 50        |
| AHWH8         | AHWH, Wuhu city, Anhui province, china     | female, age of 26        |
| AHWH9         | AHWH, Wuhu city, Anhui province, china     | male, age of 86          |
| AHWH10        | AHWH, Wuhu city, Anhui province, china     | male, age of 54          |
| AHWH11        | AHWH, Wuhu city, Anhui province, china     | male, age of 55          |
| AHWH12        | AHWH, Wuhu city, Anhui province, china     | male, age of 67          |
| AHWH13        | AHWH, Wuhu city, Anhui province, china     | male, age of 85          |
| AHWH14        | AHWH, Wuhu city, Anhui province, china     | male, age of 78          |
| AHWH15        | AHWH, Wuhu city, Anhui province, china     | male, age of 66          |
| AHWH16        | AHWH, Wuhu city, Anhui province, china     | female, age of 61        |
| AHWH17        | AHWH, Wuhu city, Anhui province, china     | female, age of 86        |
| AHWH18        | AHWH, Wuhu city, Anhui province, china     | female, age of 90        |
| AHWH19        | AHWH, Wuhu city, Anhui province, china     | male, age of 44          |
| AHWH20        | AHWH, Wuhu city, Anhui province, china     | female, age of 74        |
| FJLY1         | FJLJ, Longyan city, Fujian province, china | male, age of 83          |
| FJLY2         | FJLJ, Longyan city, Fujian province, china | male, age of 55          |
| FJLY3         | FJLJ, Longyan city, Fujian province, china | female, age of 54        |
| FJLY4         | FJLJ, Longyan city, Fujian province, china | female, age of 30        |
| FJLY5         | FJLJ, Longyan city, Fujian province, china | male, age of 13          |
| FJLY6         | FJLJ, Longyan city, Fujian province, china | male, age of 80          |
| FJLY7         | FJLJ, Longyan city, Fujian province, china | female, age of 14        |
| FJLY8         | FJLJ, Longyan city, Fujian province, china | male, age of 61          |
| FJLY9         | FJLJ, Longyan city, Fujian province, china | female, age of 34        |
| FJLY10        | FJLJ, Longyan city, Fujian province, china | female, age of 63        |
| FJLY11        | FJLJ, Longyan city, Fujian province, china | /                        |
| FJLY12        | FJLJ, Longyan city, Fujian province, china | female, age of 10        |
| FJLY13        | FJLJ, Longyan city, Fujian province, china | male, age of 43          |
| FJLY14        | FJLJ, Longyan city, Fujian province, china | female, age of 75        |
| FJLY15        | FJLJ, Longyan city, Fujian province, china | female, /                |
| FJLY16        | FJLJ, Longyan city, Fujian province, china | female, age of 71        |

**Food and Function**

---

|        |                                            |                   |
|--------|--------------------------------------------|-------------------|
| FJLY17 | FJLJ, Longyan city, Fujian province, china | male, age of 9    |
| FJLY18 | FJLJ, Longyan city, Fujian province, china | female, age of 44 |
| FJLY19 | FJLJ, Longyan city, Fujian province, china | female, age of 60 |
| FJLY20 | FJLJ, Longyan city, Fujian province, china | male, age of 52   |
| GSZY1  | GSZY, Zhangye city, Gansu province, china  | female, age of 13 |
| GSZY2  | GSZY, Zhangye city, Gansu province, china  | male, age of 10   |
| GSZY3  | GSZY, Zhangye city, Gansu province, china  | male, age of 11   |
| GSZY4  | GSZY, Zhangye city, Gansu province, china  | male, age of 13   |
| GSZY5  | GSZY, Zhangye city, Gansu province, china  | female, age of 13 |
| GSZY6  | GSZY, Zhangye city, Gansu province, china  | male, age of 10   |
| GSZY7  | GSZY, Zhangye city, Gansu province, china  | male, age of 8    |
| GSZY8  | GSZY, Zhangye city, Gansu province, china  | male, age of 13   |
| GSZY9  | GSZY, Zhangye city, Gansu province, china  | female, age of 3  |
| GSZY10 | GSZY, Zhangye city, Gansu province, china  | male, age of 14   |
| GSZY11 | GSZY, Zhangye city, Gansu province, china  | female, age of 13 |
| GSZY12 | GSZY, Zhangye city, Gansu province, china  | male, age of 8    |
| GSZY13 | GSZY, Zhangye city, Gansu province, china  | male, age of 10   |
| GSZY14 | GSZY, Zhangye city, Gansu province, china  | male, age of 10   |
| GSZY15 | GSZY, Zhangye city, Gansu province, china  | male, 8 month     |
| GSZY16 | GSZY, Zhangye city, Gansu province, china  | female, age of 13 |
| GSZY17 | GSZY, Zhangye city, Gansu province, china  | male, age of 12   |
| GSZY18 | GSZY, Zhangye city, Gansu province, china  | female, age of 13 |
| GSZY19 | GSZY, Zhangye city, Gansu province, china  | male, age of 13   |
| GSZY20 | GSZY, Zhangye city, Gansu province, china  | male, age of 12   |
| GXGL1  | GXGL, Guilin city, Guangxi province, china | female, age of 37 |
| GXGL2  | GXGL, Guilin city, Guangxi province, china | female, age of 55 |
| GXGL3  | GXGL, Guilin city, Guangxi province, china | male, age of 11   |
| GXGL4  | GXGL, Guilin city, Guangxi province, china | male, age of 37   |
| GXGL5  | GXGL, Guilin city, Guangxi province, china | male, age of 8    |
| GXGL6  | GXGL, Guilin city, Guangxi province, china | male, age of 67   |
| GXGL7  | GXGL, Guilin city, Guangxi province, china | male, age of 7    |
| GXGL8  | GXGL, Guilin city, Guangxi province, china | female, age of 67 |
| GXGL9  | GXGL, Guilin city, Guangxi province, china | female, age of 77 |
| GXGL10 | GXGL, Guilin city, Guangxi province, china | female, age of 82 |
| GXGL11 | GXGL, Guilin city, Guangxi province, china | female, age of 51 |
| GXGL12 | GXGL, Guilin city, Guangxi province, china | female, age of 51 |
| GXGL13 | GXGL, Guilin city, Guangxi province, china | male, age of 79   |
| GXGL14 | GXGL, Guilin city, Guangxi province, china | male, age of 64   |
| GXGL15 | GXGL, Guilin city, Guangxi province, china | female, age of 7  |

---

**Food and Function**

---

|         |                                                 |                   |
|---------|-------------------------------------------------|-------------------|
| GXGL16  | GXGL, Guilin city, Guangxi province, china      | female, age of 9  |
| GXGL17  | GXGL, Guilin city, Guangxi province, china      | female, age of 58 |
| GXGL18  | GXGL, Guilin city, Guangxi province, china      | male, age of 25   |
| GXGL19  | GXGL, Guilin city, Guangxi province, china      | male, age of 60   |
| GXGL20  | GXGL, Guilin city, Guangxi province, china      | female, age of 23 |
| HLJZD1  | HLJZD, Zhaodong city, Heilongjiang province     | female, age of 52 |
| HLJZD2  | HLJZD, Zhaodong city, Heilongjiang province     | female, age of 61 |
| HLJZD3  | HLJZD, Zhaodong city, Heilongjiang province     | /                 |
| HLJZD4  | HLJZD, Zhaodong city, Heilongjiang province     | female, age of 55 |
| HLJZD5  | HLJZD, Zhaodong city, Heilongjiang province     | female, age of 29 |
| HLJZD6  | HLJZD, Zhaodong city, Heilongjiang province     | female, age of 46 |
| HLJZD7  | HLJZD, Zhaodong city, Heilongjiang province     | female, age of 54 |
| HLJZD8  | HLJZD, Zhaodong city, Heilongjiang province     | male, age of 51   |
| HLJZD9  | HLJZD, Zhaodong city, Heilongjiang province     | male, age of 60   |
| HLJZD10 | HLJZD, Zhaodong city, Heilongjiang province     | male, age of 7    |
| HLJZD11 | HLJZD, Zhaodong city, Heilongjiang province     | female, age of 48 |
| HLJZD12 | HLJZD, Zhaodong city, Heilongjiang province     | male, age of 47   |
| HLJZD13 | HLJZD, Zhaodong city, Heilongjiang province     | /                 |
| HLJZD14 | HLJZD, Zhaodong city, Heilongjiang province     | female, age of 38 |
| HLJZD15 | HLJZD, Zhaodong city, Heilongjiang province     | female, age of 52 |
| HLJZD16 | HLJZD, Zhaodong city, Heilongjiang province     | male, age of 46   |
| HLJZD17 | HLJZD, Zhaodong city, Heilongjiang province     | female, age of 51 |
| HLJZD18 | HLJZD, Zhaodong city, Heilongjiang province     | female, age of 47 |
| HLJZD19 | HLJZD, Zhaodong city, Heilongjiang province     | male, age of 7    |
| HLJZD20 | HLJZD, Zhaodong city, Heilongjiang province     | male, age of 53   |
| SHCM1   | SHCM, Chongming county, Shanghai city,<br>China | female, age of 64 |
| SHCM2   | SHCM, Chongming county, Shanghai city,<br>China | female, age of 69 |
| SHCM3   | SHCM, Chongming county, Shanghai city,<br>China | female, age of 57 |
| SHCM4   | SHCM, Chongming county, Shanghai city,<br>China | female, age of 56 |
| SHCM5   | SHCM, Chongming county, Shanghai city,<br>China | male, age of 7    |
| SHCM6   | SHCM, Chongming county, Shanghai city,<br>China | male, age of 74   |
| SHCM7   | SHCM, Chongming county, Shanghai city,<br>China | male, age of 56   |

---



**Food and Function**

---

|         |                                              |                   |
|---------|----------------------------------------------|-------------------|
| SHCM8   | SHCM, Chongming county, Shanghai city, China | female, age of 47 |
| SHCM9   | SHCM, Chongming county, Shanghai city, China | female, age of 59 |
| SHCM10  | SHCM, Chongming county, Shanghai city, China | male, age of 72   |
| SHCM11  | SHCM, Chongming county, Shanghai city, China | female, age of 73 |
| SHCM12  | SHCM, Chongming county, Shanghai city, China | female, age of 66 |
| SHCM13  | SHCM, Chongming county, Shanghai city, China | male, age of 74   |
| SHCM14  | SHCM, Chongming county, Shanghai city, China | female, age of 72 |
| SHCM15  | SHCM, Chongming county, Shanghai city, China | female, age of 65 |
| SHCM16  | SHCM, Chongming county, Shanghai city, China | male, age of 69   |
| SHCM17  | SHCM, Chongming county, Shanghai city, China | female, age of 75 |
| SHCM18  | SHCM, Chongming county, Shanghai city, China | female, age of 82 |
| SHCM19  | SHCM, Chongming county, Shanghai city, China | male, age of 68   |
| SHCM20  | SHCM, Chongming county, Shanghai city, China | female, age of 69 |
| SHXWN1  | SHXWN, Weinan city, Shanxi province, china   | female, age of 6  |
| SHXWN2  | SHXWN, Weinan city, Shanxi province, china   | female, age of 6  |
| SHXWN3  | SHXWN, Weinan city, Shanxi province, china   | male, age of 3    |
| SHXWN4  | SHXWN, Weinan city, Shanxi province, china   | female, age of 1  |
| SHXWN5  | SHXWN, Weinan city, Shanxi province, china   | female, age of 6  |
| SHXWN6  | SHXWN, Weinan city, Shanxi province, china   | male, age of 2    |
| SHXWN7  | SHXWN, Weinan city, Shanxi province, china   | /                 |
| SHXWN8  | SHXWN, Weinan city, Shanxi province, china   | female, age of 6  |
| SHXWN9  | SHXWN, Weinan city, Shanxi province, china   | female, age of 6  |
| SHXWN10 | SHXWN, Weinan city, Shanxi province, china   | male, age of 6    |
| SHXWN11 | SHXWN, Weinan city, Shanxi province, china   | male, age of 6    |
| SHXWN12 | SHXWN, Weinan city, Shanxi province, china   | male, age of 8    |
| SHXWN13 | SHXWN, Weinan city, Shanxi province, china   | male, age of 6    |
| SHXWN14 | SHXWN, Weinan city, Shanxi province, china   | male, age of 6    |

---

**Food and Function**

---

|         |                                             |                   |
|---------|---------------------------------------------|-------------------|
| SHXWN15 | SHXWN, Weinan city, Shanxi province, china  | female, age of 6  |
| SHXWN16 | SHXWN, Weinan city, Shanxi province, china  | female, age of 6  |
| SHXWN17 | SHXWN, Weinan city, Shanxi province, china  | female, age of 35 |
| SHXWN18 | SHXWN, Weinan city, Shanxi province, china  | male, age of 69   |
| SHXWN19 | SHXWN, Weinan city, Shanxi province, china  | male, age of 6    |
| SHXWN20 | SHXWN, Weinan city, Shanxi province, china  | male, age of 6    |
| XJKS1   | XJKS, Kashi city, Xinjiang province, china  | male, age of 51   |
| XJKS2   | XJKS, Kashi city, Xinjiang province, china  | male, age of 45   |
| XJKS3   | XJKS, Kashi city, Xinjiang province, china  | male, age of 85   |
| XJKS4   | XJKS, Kashi city, Xinjiang province, china  | male, age of 6    |
| XJKS5   | XJKS, Kashi city, Xinjiang province, china  | female, age of 30 |
| XJKS6   | XJKS, Kashi city, Xinjiang province, china  | male, age of 2    |
| XJKS7   | XJKS, Kashi city, Xinjiang province, china  | male, age of 80   |
| XJKS8   | XJKS, Kashi city, Xinjiang province, china  | male, age of 22   |
| XJKS9   | XJKS, Kashi city, Xinjiang province, china  | male, age of 36   |
| XJKS10  | XJKS, Kashi city, Xinjiang province, china  | male, age of 9    |
| XJKS11  | XJKS, Kashi city, Xinjiang province, china  | female, age of 44 |
| XJKS12  | XJKS, Kashi city, Xinjiang province, china  | male, age of 5    |
| XJKS13  | XJKS, Kashi city, Xinjiang province, china  | female, age of 10 |
| XJKS14  | XJKS, Kashi city, Xinjiang province, china  | male, age of 57   |
| XJKS15  | XJKS, Kashi city, Xinjiang province, china  | male, age of 5    |
| XJKS16  | XJKS, Kashi city, Xinjiang province, china  | male, age of 61   |
| XJKS17  | XJKS, Kashi city, Xinjiang province, china  | /                 |
| XJKS18  | XJKS, Kashi city, Xinjiang province, china  | female, age of 32 |
| XJKS19  | XJKS, Kashi city, Xinjiang province, china  | female, age of 52 |
| XJKS20  | XJKS, Kashi city, Xinjiang province, china  | male, age of 70   |
| XJYN1   | XJYN, Yining city, Xinjiang province, china | female, /         |
| XJYN2   | XJYN, Yining city, Xinjiang province, china | male, age of 42   |
| XJYN3   | XJYN, Yining city, Xinjiang province, china | male, /           |
| XJYN4   | XJYN, Yining city, Xinjiang province, china | female, age of 53 |
| XJYN5   | XJYN, Yining city, Xinjiang province, china | male, /           |
| XJYN6   | XJYN, Yining city, Xinjiang province, china | /                 |
| XJYN7   | XJYN, Yining city, Xinjiang province, china | female, age of 55 |
| XJYN8   | XJYN, Yining city, Xinjiang province, china | male, age of 36   |
| XJYN9   | XJYN, Yining city, Xinjiang province, china | male, age of 37   |
| XJYN10  | XJYN, Yining city, Xinjiang province, china | female, age of 44 |
| XJYN11  | XJYN, Yining city, Xinjiang province, china | male, /           |
| XJYN12  | XJYN, Yining city, Xinjiang province, china | male, age of 34   |
| XJYN13  | XJYN, Yining city, Xinjiang province, china | female, age of 42 |

---

**Food and Function**

---

|        |                                             |                   |
|--------|---------------------------------------------|-------------------|
| XJYN14 | XJYN, Yining city, Xinjiang province, china | female, age of 68 |
| XJYN15 | XJYN, Yining city, Xinjiang province, china | female, age of 40 |
| XJYN16 | XJYN, Yining city, Xinjiang province, china | female, /         |
| XJYN17 | XJYN, Yining city, Xinjiang province, china | male, /           |
| XJYN18 | XJYN, Yining city, Xinjiang province, china | female, age of 52 |
| XJYN19 | XJYN, Yining city, Xinjiang province, china | male, age of 46   |
| XJYN20 | XJYN, Yining city, Xinjiang province, china | male, age of 28   |
| YNLJ1  | YNLJ, Lijiang city, Yunnan province, china  | /                 |
| YNLJ2  | YNLJ, Lijiang city, Yunnan province, china  | /                 |
| YNLJ3  | YNLJ, Lijiang city, Yunnan province, china  | /                 |
| YNLJ4  | YNLJ, Lijiang city, Yunnan province, china  | female, age of 45 |
| YNLJ5  | YNLJ, Lijiang city, Yunnan province, china  | /                 |
| YNLJ6  | YNLJ, Lijiang city, Yunnan province, china  | /                 |
| YNLJ7  | YNLJ, Lijiang city, Yunnan province, china  | /                 |
| YNLJ8  | YNLJ, Lijiang city, Yunnan province, china  | female, age of 49 |
| YNLJ9  | YNLJ, Lijiang city, Yunnan province, china  | /                 |
| YNLJ10 | YNLJ, Lijiang city, Yunnan province, china  | male, /           |
| YNLJ11 | YNLJ, Lijiang city, Yunnan province, china  | female, /         |
| YNLJ12 | YNLJ, Lijiang city, Yunnan province, china  | /                 |
| YNLJ13 | YNLJ, Lijiang city, Yunnan province, china  | /                 |
| YNLJ14 | YNLJ, Lijiang city, Yunnan province, china  | male, age of 54   |
| YNLJ15 | YNLJ, Lijiang city, Yunnan province, china  | female, age of 41 |
| YNLJ16 | YNLJ, Lijiang city, Yunnan province, china  | /                 |
| YNLJ17 | YNLJ, Lijiang city, Yunnan province, china  | male, age of 46   |
| YNLJ18 | YNLJ, Lijiang city, Yunnan province, china  | male, age of 66   |
| YNLJ19 | YNLJ, Lijiang city, Yunnan province, china  | /                 |
| YNLJ20 | YNLJ, Lijiang city, Yunnan province, china  | male, age of 58   |

---
